# Supplementary material
Source: PubMed Central journal article supplement (PMC2798227)

**A**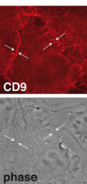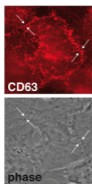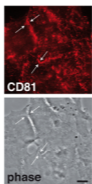**B**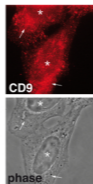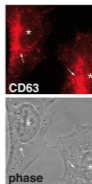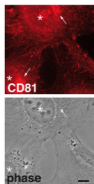**Supplementary Figure 1**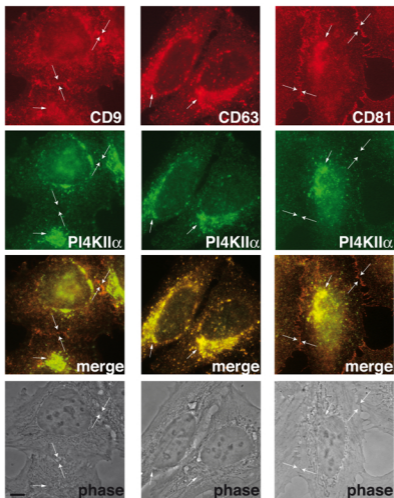**Supplementary Figure 2**

Supplement: supp_78_1_204__1.pdf [file supp_78_1_204__1.pdf]

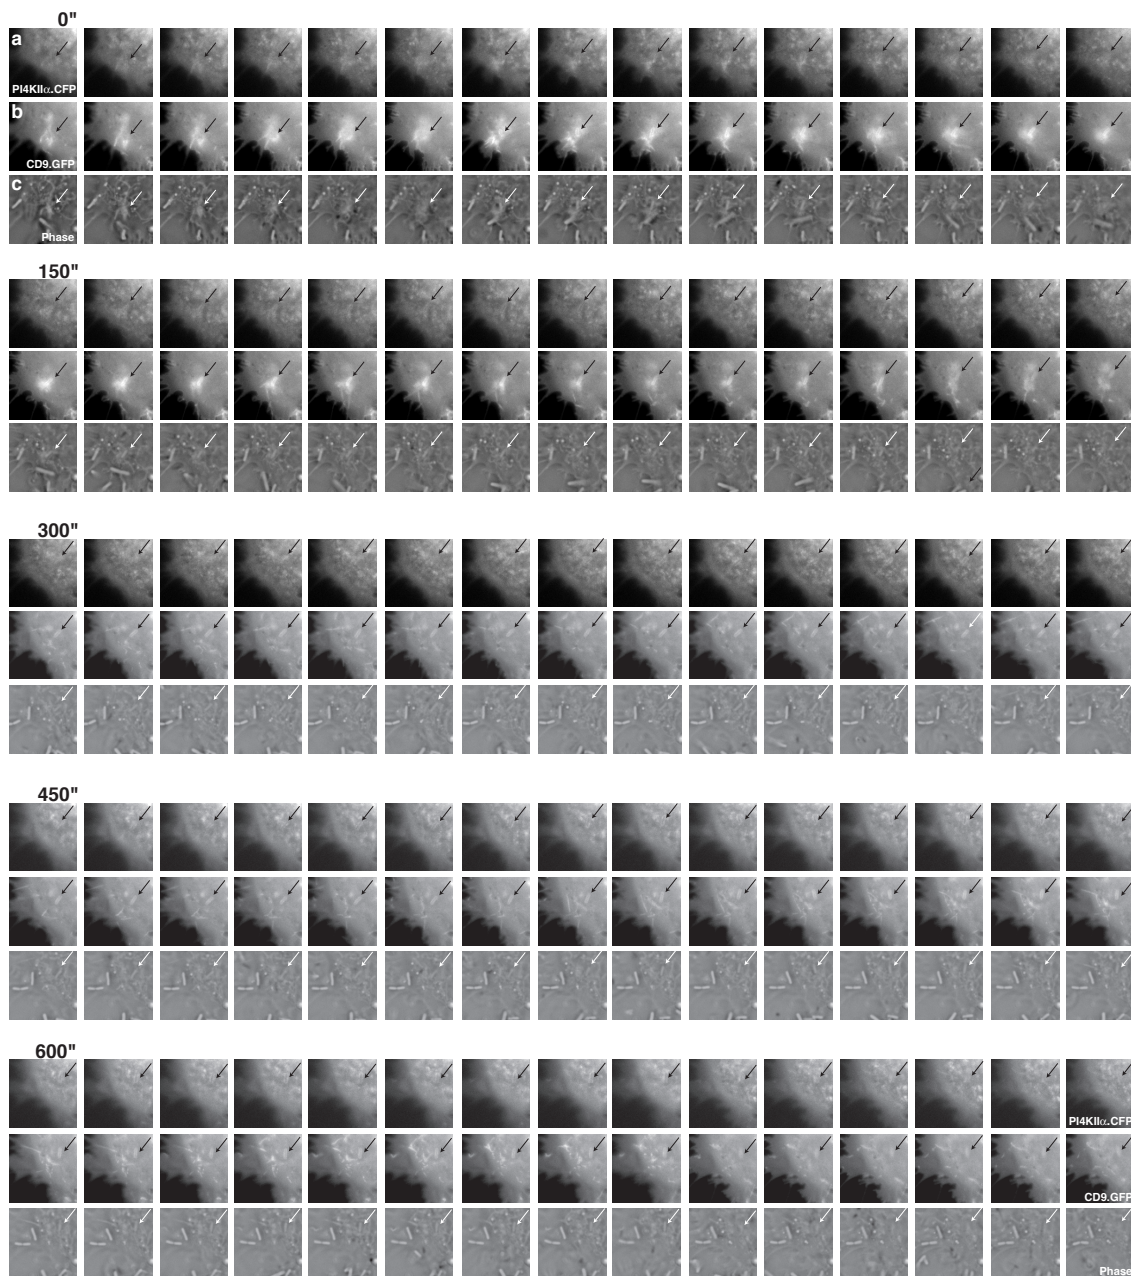

**Supplementary Figure 3**

Supplement: supp_78_1_204__2.pdf [file supp_78_1_204__2.pdf]

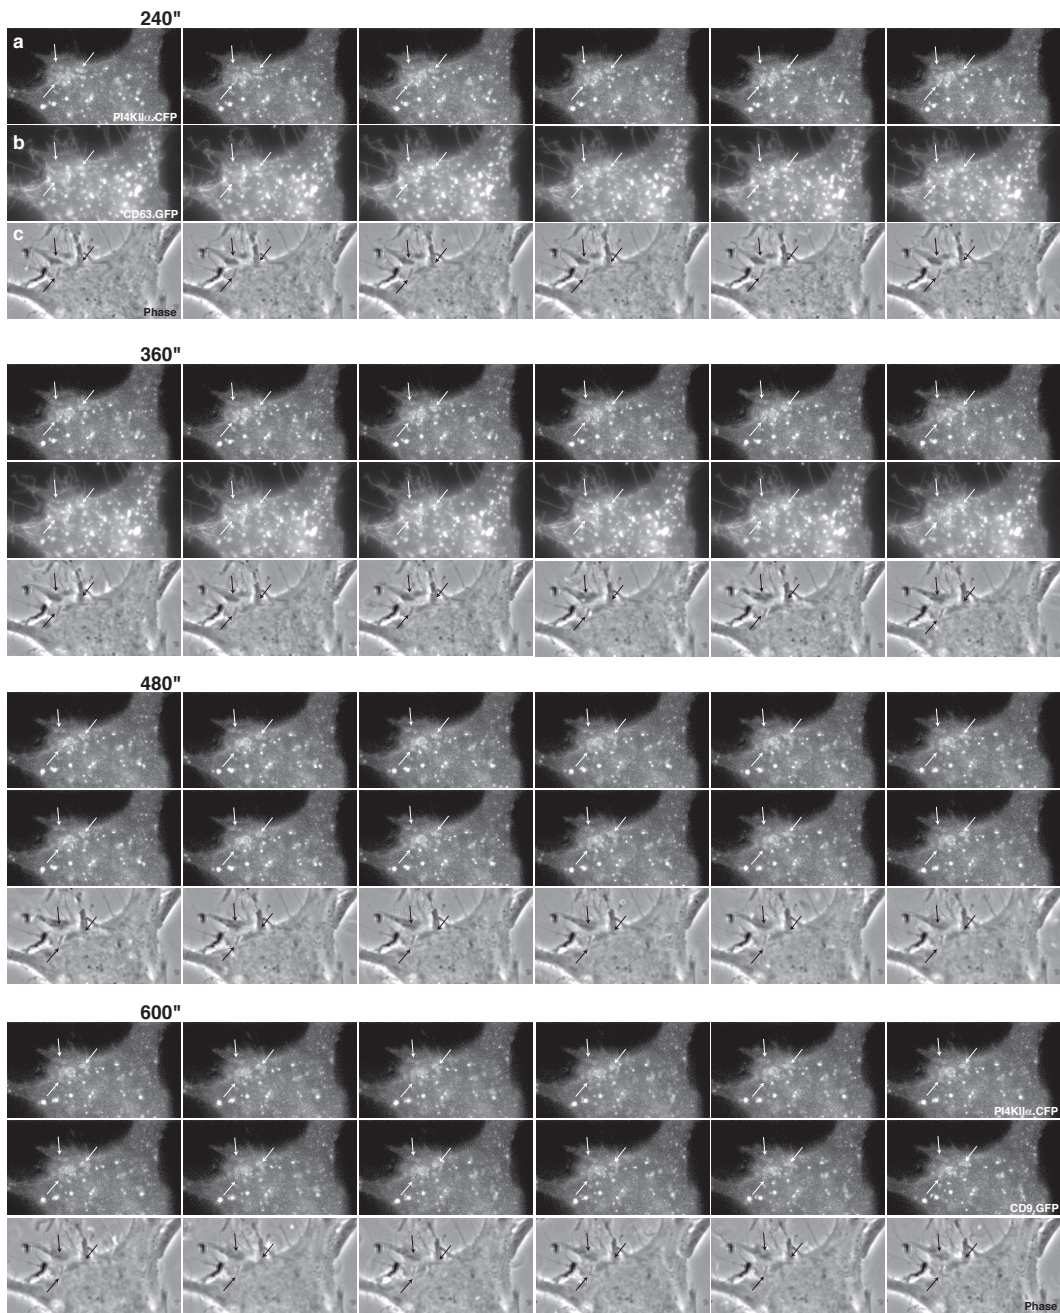

**Supplementary Figure 4**

Supplement: supp_78_1_204__3.pdf [file supp_78_1_204__3.pdf]

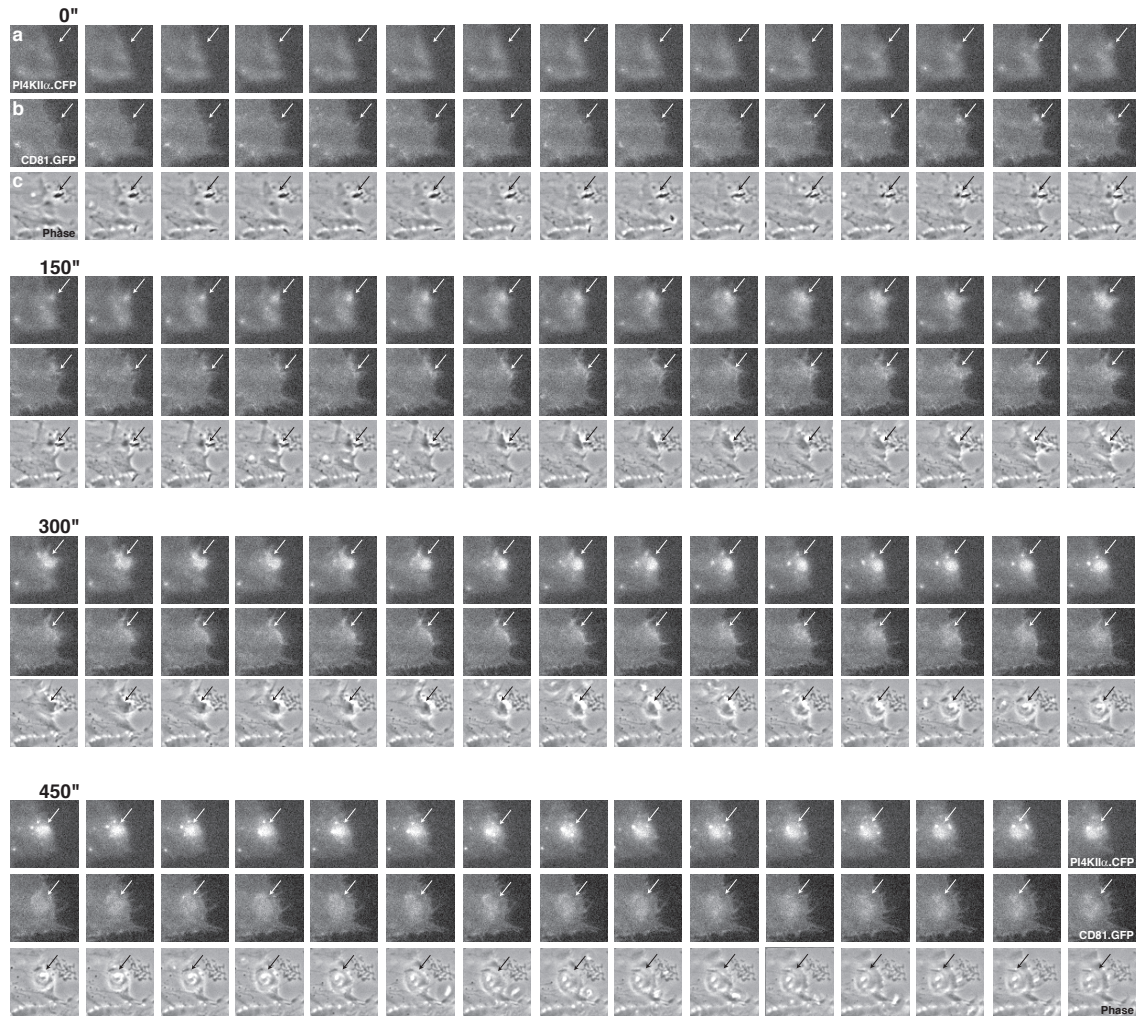

## Supplementary Figure 5

Supplement: supp_78_1_204__4.pdf [file supp_78_1_204__4.pdf]
